# Supplementary material
Source: publisher site journal article supplement (https://www.dovepress.com/article/466129)
Supplement: Supplementary file 1 [file get_supplementary_file.php]

## SUPPLEMENTARY MATERIAL

**Table S1.** Medicines under additional monitoring before December 2017, included in the study.

|                                              | BRAND NAME                                                      | ACTIVE SUBSTANCE                     |
|----------------------------------------------|-----------------------------------------------------------------|--------------------------------------|
| Diabetes Mellitus Type 2 (DM2)               | EBYMECT (5/1000 MG 56 COATED TABLETS)                           | METFORMIN + DAPAGLIFLOZIN            |
|                                              | EBYMECT (5/850 MG 56 COATED TABLETS)                            | METFORMIN + DAPAGLIFLOZIN            |
|                                              | EDISTRIDE (10 MG 28 COATED TABLETS)                             | DAPAGLIFLOZIN                        |
|                                              | XIGDUO (5/1000 MG 56 COATED TABLETS)                            | METFORMIN + DAPAGLIFLOZIN            |
|                                              | XIGDUO (5/850 MG 56 COATED TABLETS)                             | METFORMIN + DAPAGLIFLOZIN            |
|                                              | INVOKANA (100 MG 30 COATED TABLETS)                             | CANAGLIFLOZIN                        |
|                                              | INVOKANA (300 MG 30 COATED TABLETS)                             | CANAGLIFLOZIN                        |
|                                              | VOKANAMET (150/1000 MG 60 COATED TABLETS)                       | METFORMIN + CANAGLIFLOZIN            |
|                                              | VOKANAMET (150/850 MG 60 COATED TABLETS)                        | METFORMIN + CANAGLIFLOZIN            |
|                                              | VOKANAMET (50/1000 MG 60 COATED TABLETS)                        | METFORMIN + CANAGLIFLOZIN            |
|                                              | VOKANAMET (50/850 MG 60 COATED TABLETS)                         | METFORMIN + CANAGLIFLOZIN            |
|                                              | JARDIANCE (10 MG 30 COATED TABLETS)                             | EMPAGLIFLOZIN                        |
|                                              | JARDIANCE (25 MG 30 COATED TABLETS)                             | EMPAGLIFLOZIN                        |
|                                              | SYNJARDY (12.5/1000 MG 60 COATED TABLETS)                       | METFORMIN + EMPAGLIFLOZIN            |
|                                              | SYNJARDY (5/1000 MG 60 COATED TABLETS)                          | METFORMIN + EMPAGLIFLOZIN            |
|                                              | TRULICITY (1.5 MG 4 PRE-FILLED PEN 0.5 ML)                      | DULAGLUTIDE                          |
| Cardiovascular disease (CVD)                 | LIXIANA (30 MG 28 COATED TABLETS)                               | EDOXABAN                             |
|                                              | LIXIANA (60 MG 28 COATED TABLETS)                               | EDOXABAN                             |
|                                              | XARELTO (15 MG 28 COATED TABLETS)                               | RIVAROXABAN                          |
|                                              | XARELTO (20 MG 28 COATED TABLETS)                               | RIVAROXABAN                          |
|                                              | ENTRESTO (24/26 MG 28 COATED TABLETS)                           | VALSARTAN + SACUBITRIL               |
|                                              | ENTRESTO (49/51 MG 56 COATED TABLETS)                           | VALSARTAN + SACUBITRIL               |
|                                              | ENTRESTO (97/103 MG 56 COATED TABLETS)                          | VALSARTAN + SACUBITRIL               |
|                                              | NEPARVIS (24/26 MG 28 COATED TABLETS)                           | VALSARTAN + SACUBITRIL               |
|                                              | NEPARVIS (49/51 MG 56 COATED TABLETS)                           | VALSARTAN + SACUBITRIL               |
|                                              | NEPARVIS (97/103 MG 56 COATED TABLETS)                          | VALSARTAN + SACUBITRIL               |
| Chronic Obstructive Pulmonary Disease (COPD) | RELVAR ELLIPTA (184/22 MCG/DOSES POWDER 1 INHALER 30 DOSES)     | VILANTEROL + FLUTICASONE FUROATE     |
|                                              | RELVAR ELLIPTA (92/22 MCG/DOSES POWDER 1 INHALER 30 DOSES)      | VILANTEROL + FLUTICASONE FUROATE     |
|                                              | ULTIBRO BREEZHALER (85/43 MCG 30 INHALATION CAPSULES + INHALER) | INDACATEROL + GLYCOPYRRONIUM BROMIDE |
|                                              | INCRUSE ELLIPTA (55 MCG/DOSES 1 INHALER 30 DOSES)               | UMECLIDINIUM BROMIDE                 |

**Table S2.** The TIDieR (Template for Intervention Description and Replication) checklist.

| Item number | Item                                                                                                                                                                                                                                                                                                                                                                                                                                                                                                                                                                                                                                                                                                                                                                                                        | Where located                           |                 |
|-------------|-------------------------------------------------------------------------------------------------------------------------------------------------------------------------------------------------------------------------------------------------------------------------------------------------------------------------------------------------------------------------------------------------------------------------------------------------------------------------------------------------------------------------------------------------------------------------------------------------------------------------------------------------------------------------------------------------------------------------------------------------------------------------------------------------------------|-----------------------------------------|-----------------|
|             |                                                                                                                                                                                                                                                                                                                                                                                                                                                                                                                                                                                                                                                                                                                                                                                                             | Primary paper (page or appendix number) | Other (details) |
|             | <b>BRIEF NAME</b>                                                                                                                                                                                                                                                                                                                                                                                                                                                                                                                                                                                                                                                                                                                                                                                           |                                         |                 |
| 1.          | Provide the name or a phrase that describes the intervention.<br><i>New pharmacy service focused on safety, adherence, use and knowledge and quality of life of antidiabetics, bronchodilators and antithrombotics considered medicines under additional monitoring.</i>                                                                                                                                                                                                                                                                                                                                                                                                                                                                                                                                    | Page 4                                  | ____ N/A ____   |
|             | <b>WHY</b>                                                                                                                                                                                                                                                                                                                                                                                                                                                                                                                                                                                                                                                                                                                                                                                                  |                                         |                 |
| 2.          | Describe any rationale, theory, or goal of the elements essential to the intervention.<br><i>Community pharmacists are the most accessible healthcare providers, and their availability is crucial to strengthen communication with patients in order to deepen into the causes of non-adherence and into the needs of improving health promotion and medication knowledge, through provision of pharmaceutical care.</i><br><i>Adherence and an appropriate knowledge about the treatment are especially important in the case of medicines under additional monitoring (AM), due to the early collection of information. The main goal of AM is to collect information to further inform ADR, which are directly linked to patient health outcomes, as they tend to worsen patients' quality of life.</i> | Pages 4,5                               | ____ N/A ____   |

|                          |                                                                                                                                                                                                                                                                                                   |                 |           |
|--------------------------|---------------------------------------------------------------------------------------------------------------------------------------------------------------------------------------------------------------------------------------------------------------------------------------------------|-----------------|-----------|
| <b>WHAT</b>              |                                                                                                                                                                                                                                                                                                   |                 |           |
| 3.                       | Materials: Describe any physical or informational materials used in the intervention, including those provided to participants or used in intervention delivery or in training of intervention providers. Provide information on where the materials can be accessed (e.g. online appendix, URL). | Pages 4,5,6,7,8 | ___N/A___ |
| 4.                       | Procedures: Describe each of the procedures, activities, and/or processes used in the intervention, including any enabling or support activities.                                                                                                                                                 | Pages 4,5,6,7,8 | ___N/A___ |
| <b>WHO PROVIDED</b>      |                                                                                                                                                                                                                                                                                                   |                 |           |
| 5.                       | For each category of intervention provider (e.g. psychologist, nursing assistant), describe their expertise, background and any specific training given.                                                                                                                                          | Page 5,6        | ___N/A___ |
| <b>HOW</b>               |                                                                                                                                                                                                                                                                                                   |                 |           |
| 6.                       | Describe the modes of delivery (e.g. face-to-face or by some other mechanism, such as internet or telephone) of the intervention and whether it was provided individually or in a group.                                                                                                          | Page 5,6        | ___N/A___ |
| <b>WHERE</b>             |                                                                                                                                                                                                                                                                                                   |                 |           |
| 7.                       | Describe the type(s) of location(s) where the intervention occurred, including any necessary infrastructure or relevant features.                                                                                                                                                                 | Page 5,6        | ___N/A___ |
| <b>WHEN and HOW MUCH</b> |                                                                                                                                                                                                                                                                                                   |                 |           |
| 8.                       | Describe the number of times the intervention was delivered and over what period of time including the number of sessions, their schedule, and their duration, intensity or dose.                                                                                                                 | Page 5,6        | ___N/A___ |
| <b>TAILORING</b>         |                                                                                                                                                                                                                                                                                                   |                 |           |
| 9.                       | If the intervention was planned to be personalised, titrated or adapted, then describe what, why, when, and how.                                                                                                                                                                                  | ___N/A___       | ___N/A___ |

|                      |                                                                                                                                                                        |                 |                 |
|----------------------|------------------------------------------------------------------------------------------------------------------------------------------------------------------------|-----------------|-----------------|
| <b>MODIFICATIONS</b> |                                                                                                                                                                        |                 |                 |
| <b>10.†</b>          | If the intervention was modified during the course of the study, describe the changes (what, why, when, and how).                                                      | _____ N/A _____ | _____ N/A _____ |
| <b>HOW WELL</b>      |                                                                                                                                                                        |                 |                 |
| <b>11.</b>           | Planned: If intervention adherence or fidelity was assessed, describe how and by whom, and if any strategies were used to maintain or improve fidelity, describe them. | _____ N/A _____ | _____ N/A _____ |
| <b>12.†</b>          | Actual: If intervention adherence or fidelity was assessed, describe the extent to which the intervention was delivered as planned.                                    | _____ N/A _____ | _____ N/A _____ |

N/A: no applicable for the intervention being described.

**Table S3.** Causes of non-adherence assessed by the pharmacist based on the patient's response:

| <b>BARRIERS</b>                                                                                                                                                                                                                                                                                                                                 | Resource and skill related barriers | Belief and motivation related barriers |
|-------------------------------------------------------------------------------------------------------------------------------------------------------------------------------------------------------------------------------------------------------------------------------------------------------------------------------------------------|-------------------------------------|----------------------------------------|
| Cognitive barrier                                                                                                                                                                                                                                                                                                                               | Yes                                 | No                                     |
| Forgetfulness                                                                                                                                                                                                                                                                                                                                   | Yes                                 | No                                     |
| Lack of understanding                                                                                                                                                                                                                                                                                                                           | Yes                                 | No                                     |
| Physical barrier (vision, swallowing difficulty, tremors, etc.)                                                                                                                                                                                                                                                                                 | Yes                                 | No                                     |
| Complexity of medication dosage form                                                                                                                                                                                                                                                                                                            | Yes                                 | No                                     |
| Does not want to improve his/her health                                                                                                                                                                                                                                                                                                         | No                                  | Yes                                    |
| Does not consider the information received about the medication and/or the condition adequate                                                                                                                                                                                                                                                   | No                                  | Yes                                    |
| Not aware of the severity of his/her condition                                                                                                                                                                                                                                                                                                  | No                                  | Yes                                    |
| Not aware of the benefits of the medication                                                                                                                                                                                                                                                                                                     | No                                  | Yes                                    |
| Not aware of the consequences of not following the recommendations for proper medication intake                                                                                                                                                                                                                                                 | No                                  | Yes                                    |
| Affected by taking a large number of different medications                                                                                                                                                                                                                                                                                      | No                                  | Yes                                    |
| Finds the medication dosage regimen complex                                                                                                                                                                                                                                                                                                     | No                                  | Yes                                    |
| Experiences problems with the medication dosage form                                                                                                                                                                                                                                                                                            | No                                  | Yes                                    |
| Believes they have experienced and Adverse Drug Reaction (ADR)                                                                                                                                                                                                                                                                                  | No                                  | Yes                                    |
| Cultural of belief reasons                                                                                                                                                                                                                                                                                                                      | No                                  | Yes                                    |
| Has had difficulties in accessing healthcare (changing doctors, scheduling, distance, etc.)                                                                                                                                                                                                                                                     | No                                  | Yes                                    |
| Financial reasons (co-pay, etc.)                                                                                                                                                                                                                                                                                                                | No                                  | Yes                                    |
| Other causes:                                                                                                                                                                                                                                                                                                                                   | Yes                                 | Yes                                    |
| <b>TYPE OF NON-ADHERENCE:</b><br>- <b>UNINTENTIONAL:</b> if any of the barriers related to resources and skills are identified.<br>- <b>INTENTIONAL:</b> if any of the barriers related to beliefs and motivation are identified<br>- <b>MIXED:</b> if barriers related to both resources and skills and beliefs and motivation are identified. | <b>UNINTENTIONAL</b>                | <b>INTENTIONAL</b>                     |

- **INTENTIONAL NON-ADHERENCE:** The patient has consciously or deliberately decided not to follow the recommendations for medication adherence.

- **UNINTENTIONAL NON-ADHERENCE:** the patient does not adhere to the medication for reasons beyond their control; in other words, the patient has not made a conscious decision to reject the recommendations.

- **NON-ADHERENCE** can also be **MIXED**.

**Table S4.** Table of interventions in non-adherent patients.

| <b>INTERVENTION FOR UNINTENTIONAL NON-ADHERENCE</b>                                                                            | <b>Done?</b> | <b>Date</b> | <b>Problem solved?</b> | <b>Date</b> |
|--------------------------------------------------------------------------------------------------------------------------------|--------------|-------------|------------------------|-------------|
| Keep a record of medication intake (use the active treatment sheet)                                                            |              |             |                        |             |
| Use pillbox                                                                                                                    |              |             |                        |             |
| Set an alarm as a medication reminder                                                                                          |              |             |                        |             |
| Link taking medication with a daily activity                                                                                   |              |             |                        |             |
| Manipulate the labeling of the box: pictograms, dosage indication on the box, etc.                                             |              |             |                        |             |
| Pharmaceutical advice: offer verbal and written information about the pathology                                                |              |             |                        |             |
| Pharmaceutical advice: offer verbal and written information about the medication (objectives, benefits, adverse effects, etc.) |              |             |                        |             |
| Refer the doctor to adapt the dosage regimen of the drug to the patient's situation                                            |              |             |                        |             |
| Other interventions:                                                                                                           |              |             |                        |             |

| <b>INTERVENTION FOR INTENTIONAL NON-ADHERENCE</b>                                                                              | <b>Done?</b> | <b>Date</b> | <b>Problem solved?</b> | <b>Date</b> |
|--------------------------------------------------------------------------------------------------------------------------------|--------------|-------------|------------------------|-------------|
| Pharmacist advice: offer verbal and written information about the pathology                                                    |              |             |                        |             |
| Pharmaceutical advice: offer verbal and written information about the medication (objectives, benefits, adverse effects, etc.) |              |             |                        |             |
| Refer the doctor to adapt the dosage regimen of the drug to the patient's situation                                            |              |             |                        |             |
| Active motivation                                                                                                              |              |             |                        |             |
| Make an evaluation of the possible relation Adverse Drug Reaction - medication and communicate it                              |              |             |                        |             |
| Provide information on the incidence of adverse drug reactions over time                                                       |              |             |                        |             |
| Facilitate and encourage communication with the health center, caregivers, family members, etc.                                |              |             |                        |             |
| Evaluate options to reduce drug cost                                                                                           |              |             |                        |             |
| Keep a record of medication intake                                                                                             |              |             |                        |             |
| Use pillbox                                                                                                                    |              |             |                        |             |
| Set an alarm as a medication reminder                                                                                          |              |             |                        |             |
| Link taking medication with a daily activity                                                                                   |              |             |                        |             |
| Manipulate the labelling of the box: pictograms, dosage indication on the box, etc.                                            |              |             |                        |             |
| Other interventions:                                                                                                           |              |             |                        |             |

**Table S5.** Table of interventions in case of incorrect use and knowledge.

| <b>INTERVENTION</b>                                                                | <b>Done?</b> | <b>Date</b> | <b>Verbal or written?</b> | <b>Problem solved?</b> | <b>Date</b> |
|------------------------------------------------------------------------------------|--------------|-------------|---------------------------|------------------------|-------------|
| Verbal and/or written information about the medication: <b>what it is for</b>      |              |             |                           |                        |             |
| Verbal and/or written information about the medication: <b>dose/pattern</b>        |              |             |                           |                        |             |
| Verbal and/or written information about the medication: <b>treatment duration</b>  |              |             |                           |                        |             |
| Verbal and/or written information about the medication: <b>mode of use</b>         |              |             |                           |                        |             |
| Verbal and/or written information about the medication: <b>precautions for use</b> |              |             |                           |                        |             |
| Other interventions:                                                               |              |             |                           |                        |             |
