# Supplementary material
Source: publisher site journal article supplement (https://www.dovepress.com/article/466129)
Supplement: Supplementary file 2 [file get_supplementary_file.php]

# RELVAR ELLIPTA

Fluticasone/vilanterol ▼

92/22mcg/dose  
inhalation powder 30  
doses

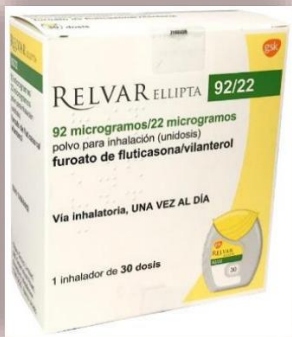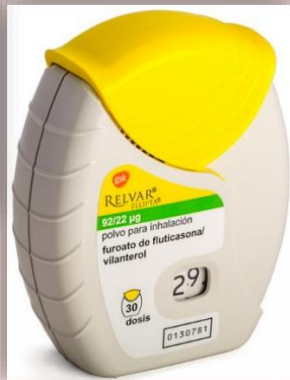

Pharmacy:

Telephone:

Time:

## What is it for?

Treatment of the disease  
chronic obstructive pulmonary disease  
(COPD).

## How is it taken?

**1 inhalation** once a day, **always at the same time.**

\*See triptych "Instructions for use"

## If you missed a dose

**Do not take a double dose to compensate.** Take the next dose at your regular time.

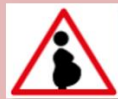

Do not use Relvar  
Ellipta during pregnancy  
and lactation

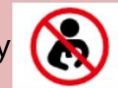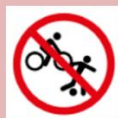

Doping: contains one or more  
prohibited substances

If you are **lactose** intolerant, consult  
the staff of your pharmacy

## Adverse effects

Side effects that you may experience,  
which are not meant to occur in  
everyone who takes it, are:

- Headache
- Upper respiratory tract infection  
(itchy throat, cough, stuffy nose...)
- **Pneumonia** (lung infection): fever,  
change in mucus color, trouble  
breathing
- Fungus in the mouth and throat:  
**To avoid them, rinse your mouth  
with water after using  
Relvar Ellipta**

If you experience any of these side  
effects or others  
contact the staff of your pharmacy.

**In case of doubt consult  
your community pharmacist**

# RELVAR ELLIPTA

Fluticasone/vilanterol ▼

92/22mcg/dose  
inhalation powder 30  
doses

## Instructions for use

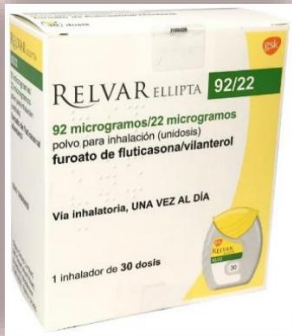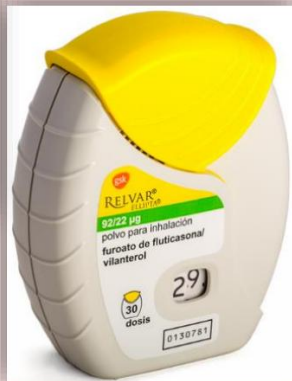

Pharmacy:

Telephone:

Time:

## Conservation

Do not store at a temperature above 25°C.

Keep the inhaler in the sealed tray until the first use. Once the tray is opened, the inhaler can be used for **6 weeks**.

Write the date the inhaler should be thrown away on the label.

...../...../.....

## Step by step instructions

### 1. Opening the container.

Do not open the tray until you are ready to start using a new inhaler. Open the tray and throw away the desiccant bag. Write down on the inhaler the date to discard.

**If you keep it in the fridge, take it out 1 hour before using it.**

**2. Prepare a dose.** Do not open the cap until you are ready to dose.

Do not shake the inhaler.

Slide the cover down until you hear a "click".

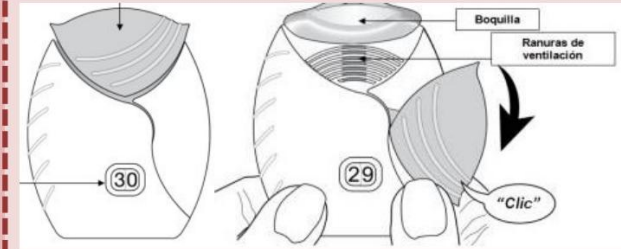

The dose counter decreases by 1 unit and the medicine is ready to be inhaled.

### 3. Inhale medication

1. Breathe out
2. Place mouthpiece between lips
3. Take a long, continuous, deep breath in
4. Hold your breath for 5 seconds
5. Remove the inhaler from your mouth
6. Exhale gently and slowly

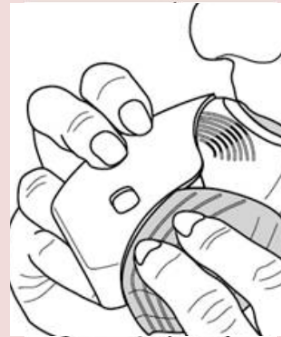

**4. Close the inhaler and rinse your mouth.** Clean the mouthpiece with a dry tissue before closing the lid. Rinse mouth with water, do not swallow.

**In case of doubt consult your community pharmacist**
